# Supplementary material for: Concentration gradients of monoamines, their precursors and metabolites in serial lumbar cerebrospinal fluid of neurologically healthy patients determined with a novel LC–MS/MS technique
Source: Springer Nature journal article supplement (doi:10.1186/s12987-023-00413-8), 2023-02-13

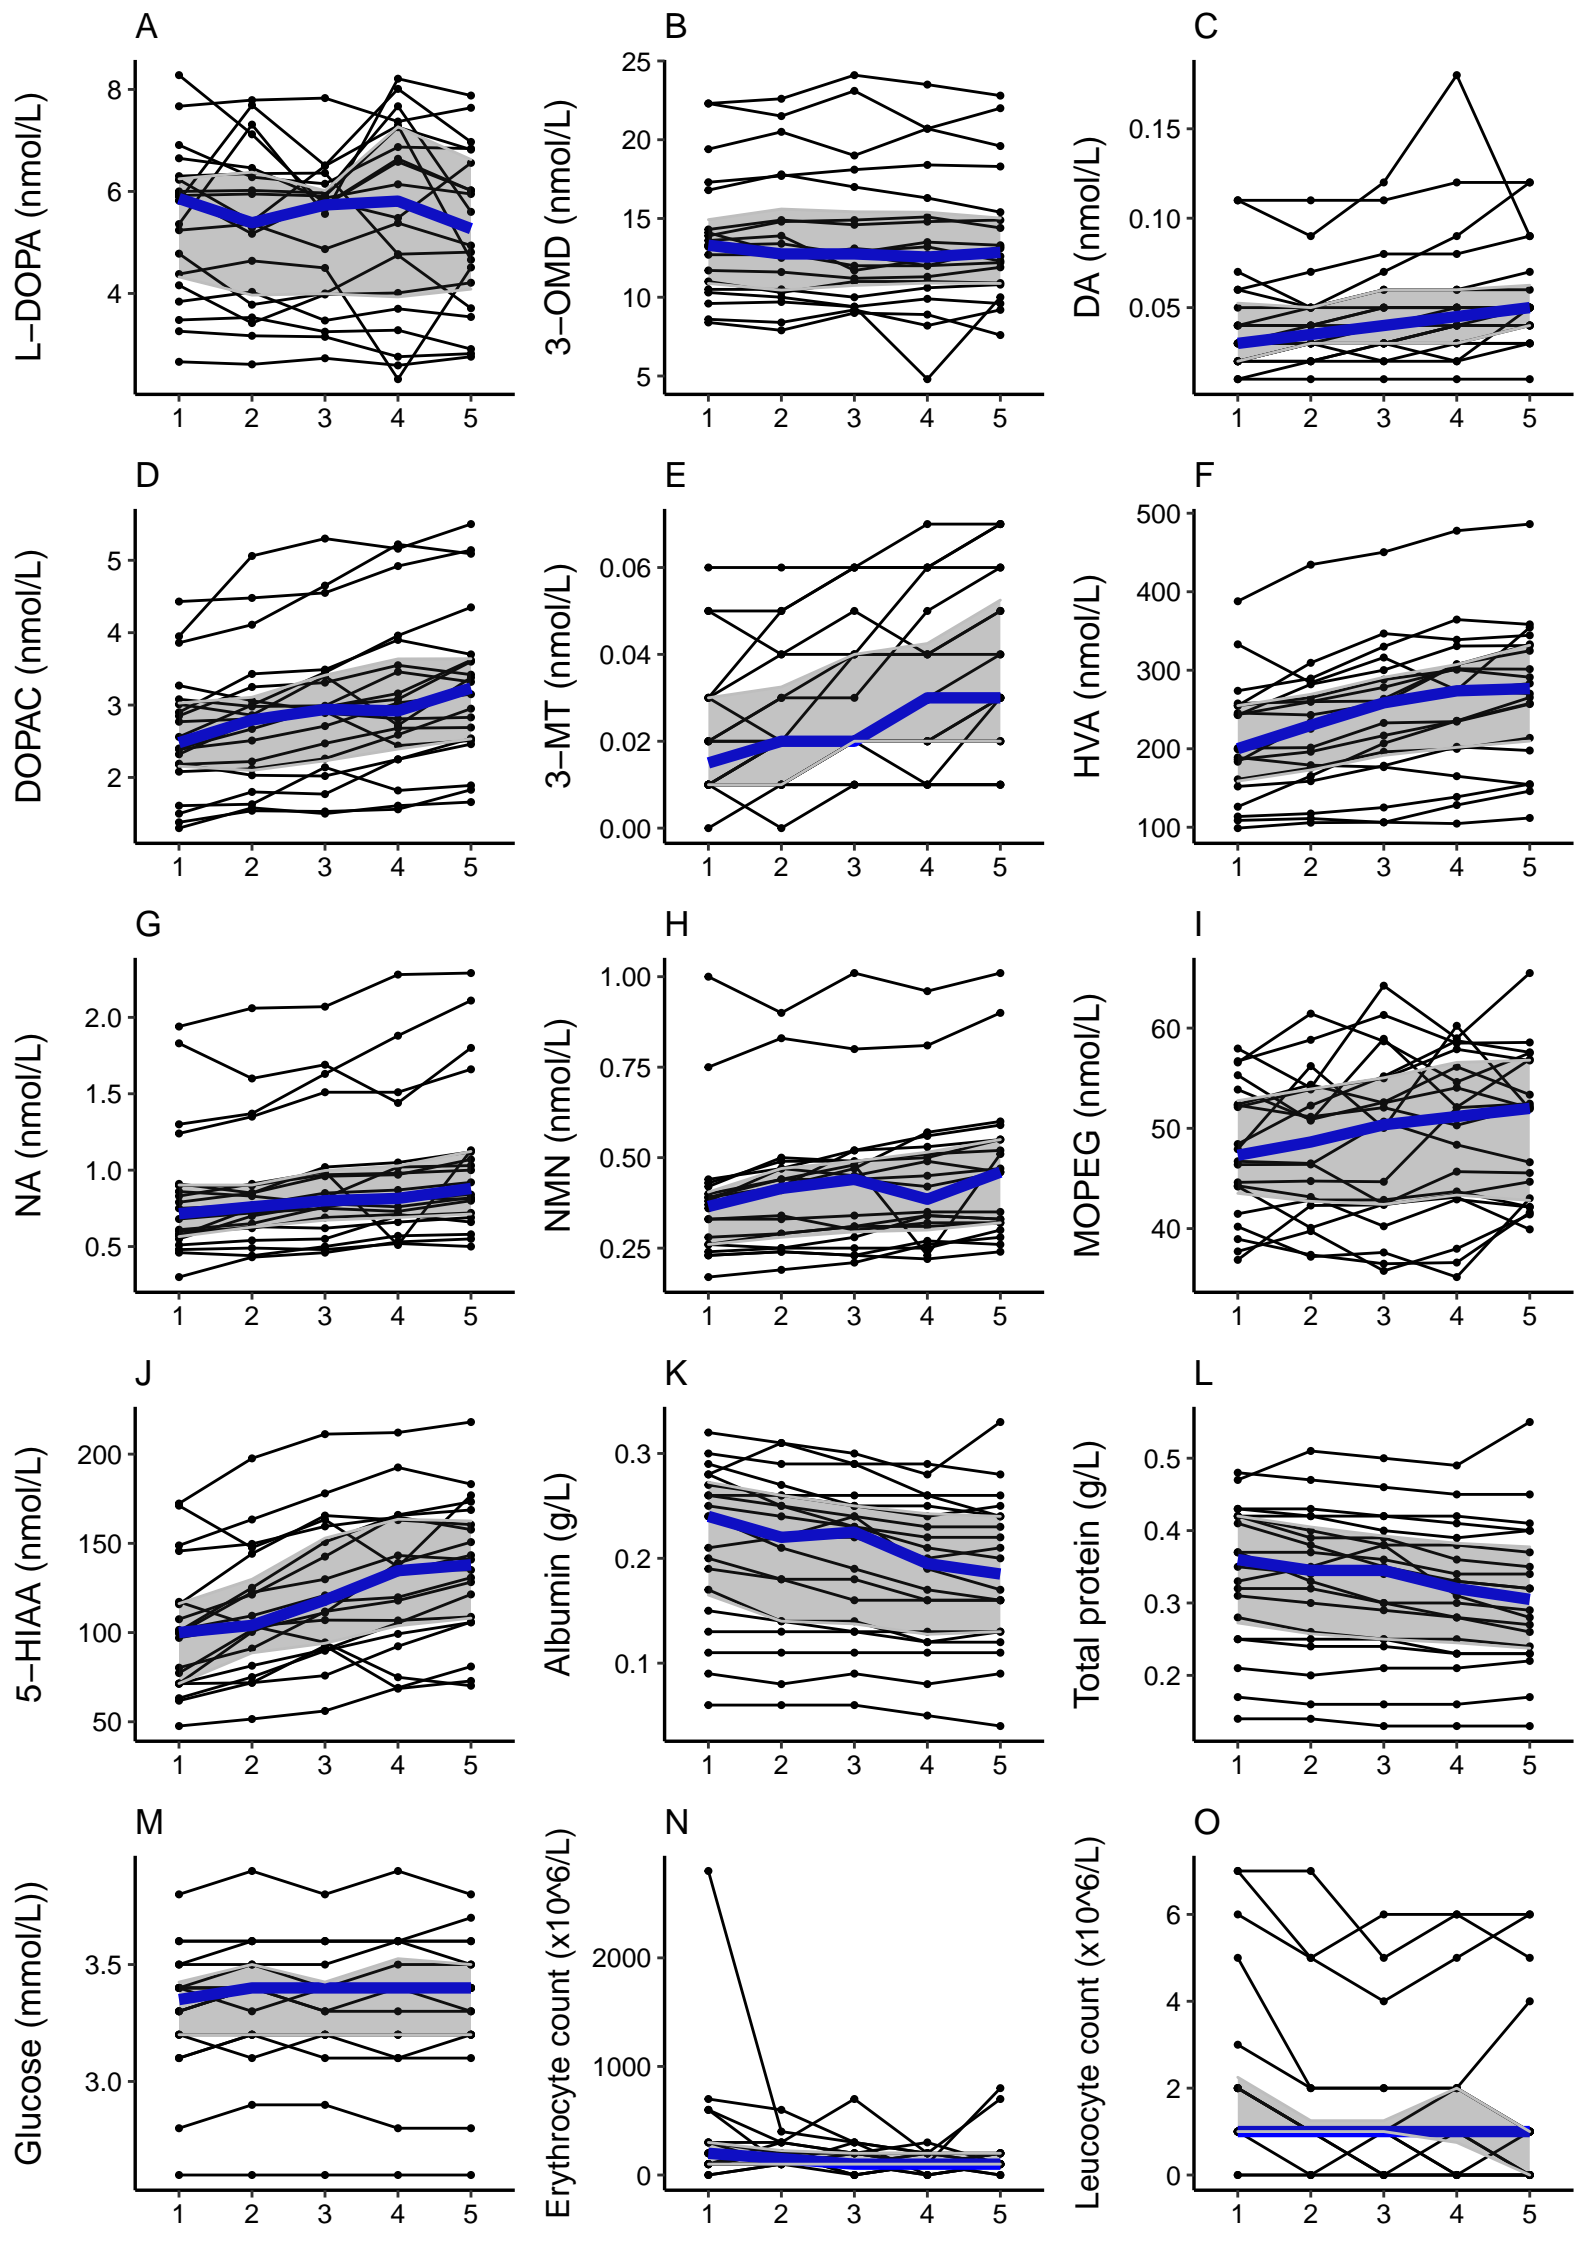

Supplement: MOESM1 [file 24022290]
